# Supplementary material
Source: PubMed Central journal article supplement (PMC4771335)

## Supplementary materials

**Figure S1.** Negative linear relationship between the prevalence of *C. psittaci* shedders and the mean Cq values accounting for the *C. psittaci* shedding (Spearman's rho = -0.636,  $P < 0.001$ ). The higher levels of *C. psittaci* shedding (lower Cq values) occurred at the peak of shedder prevalence.

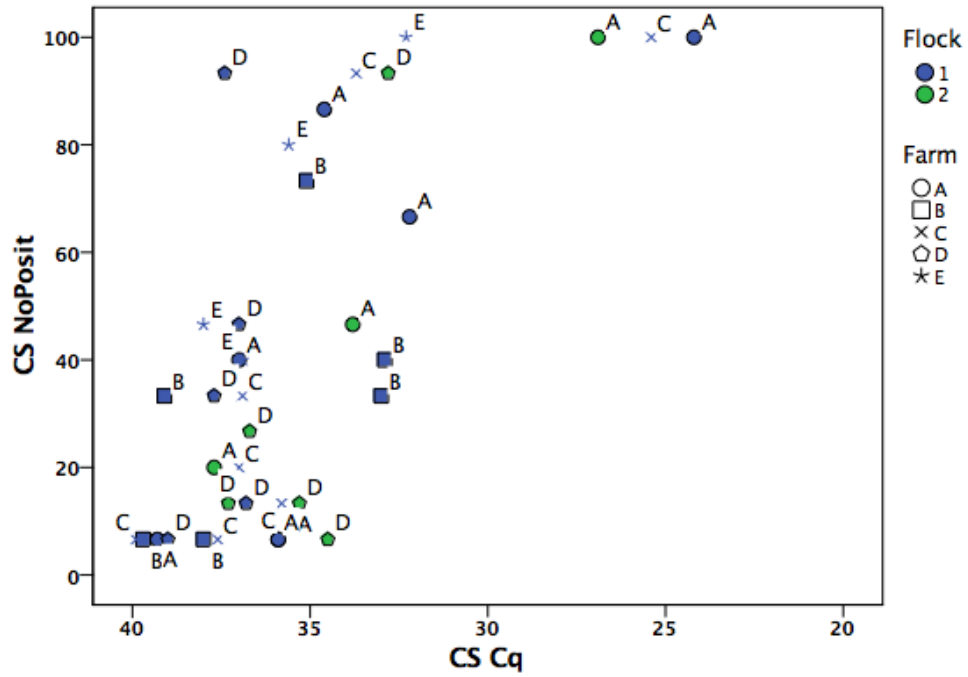

**Figure S2.** Alignment of nucleotide (A) and protein (B) vp2 fragment sequences obtained from the different duck flocks in comparison with the ORF 2 sequence of Chp1 (Accession number NC\_001741).

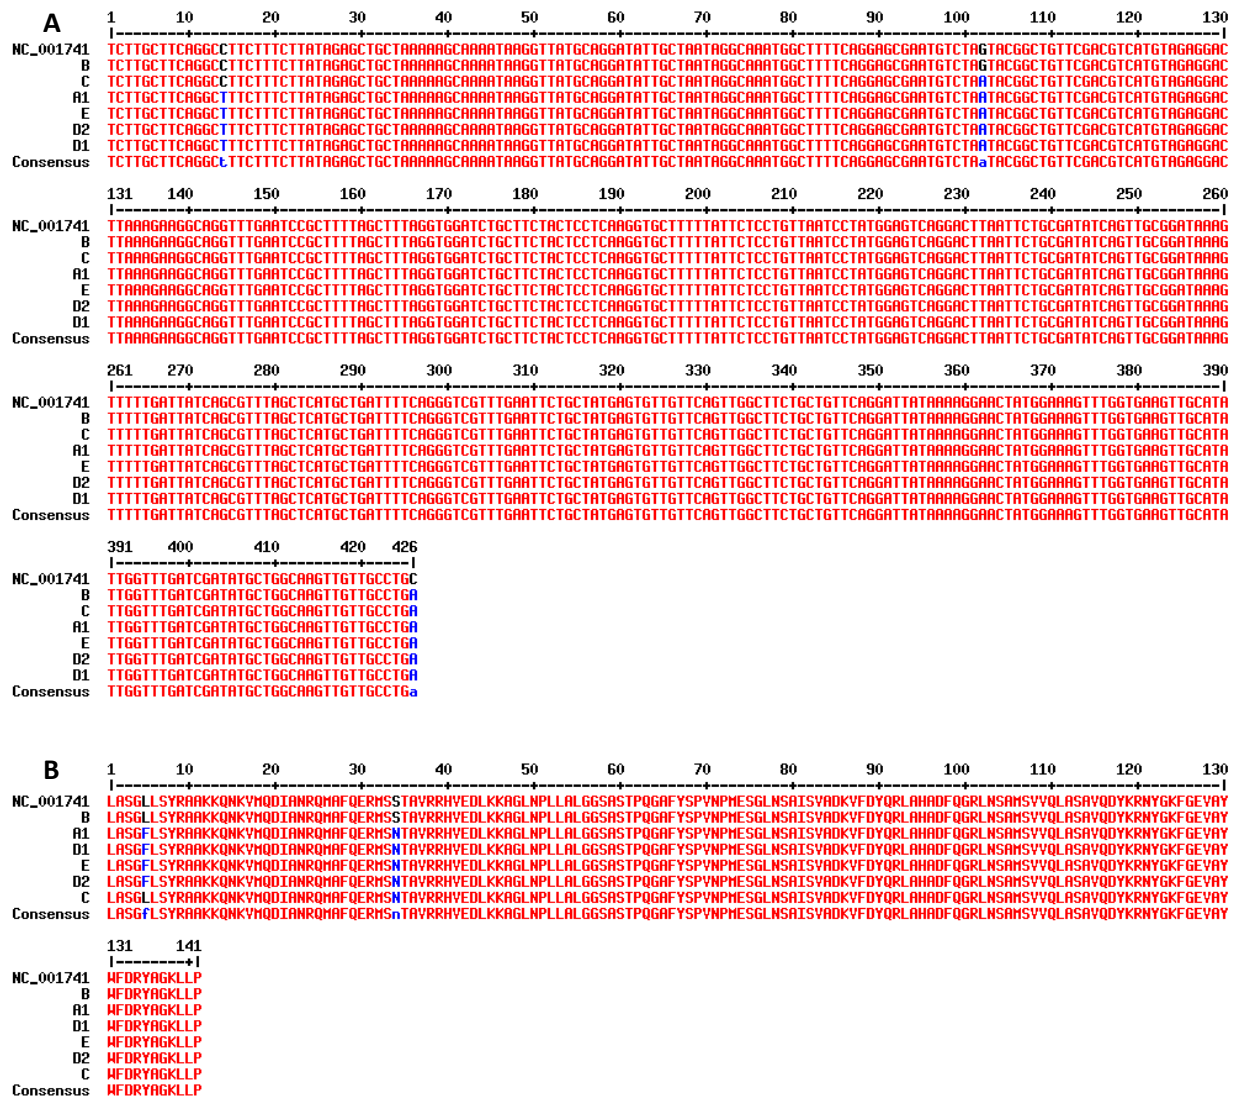

**Figure S3.** Relationship between levels of disinfection (0: "No use of disinfectant", 1: "Carried out once a year", 2: "One disinfection after washing", 3: "One disinfection after washing followed by one fumigation (Fumagri®, orthophenylphenol) ", 4: "Two disinfections, one after washing and one before arrival of next ducklings") by a disinfectant containing quaternary ammonium and glutaraldehyde (C/D QAG) and the prevalence of *C. psittaci* shedders (CS NoPosit). The differently colored points indicate the starter and expansion buildings for each farm/flock in which the disinfection was applied in various ways. A negative correlation (Spearman's rho = -0.352, p = 0.048), significant with respect to the significance level of 0.05, was detected. Lower percentages of *C. psittaci* shedders are generally associated with high levels of disinfection applied to starter buildings.

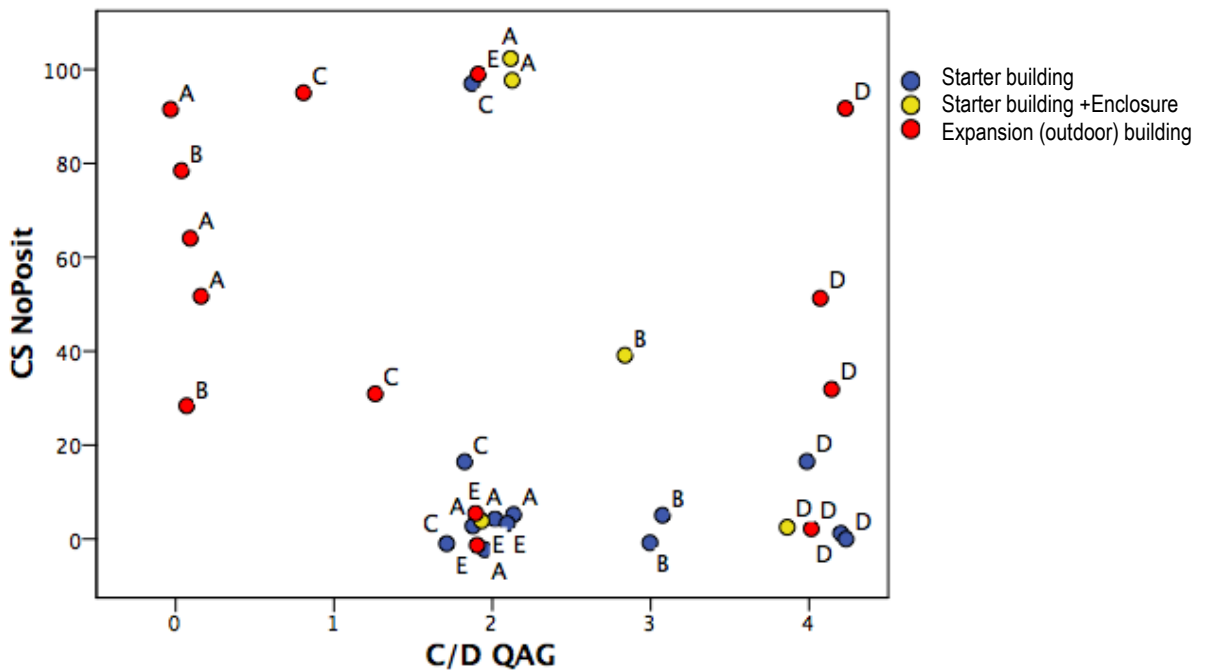

**Figure S4.** Relationship between the place of intervention (1: "open air", 2: "Building with wide-open doors", 3: "Closed building") and the prevalence of *C. psittaci* shedders (Spearman's rho = -0.629,  $p < 0.001$ ). The points indicate the percentage of positive birds in different places in which the different interventions took place. The scatterplot depicts the "place-of-operation" variable (PIPer) on the horizontal (X) axis, and the "prevalence-of-shedders" variable (CS NoPosit) on the vertical (Y) axis. The prevalence was lower when the corresponding intervention was taking place in a closed building.

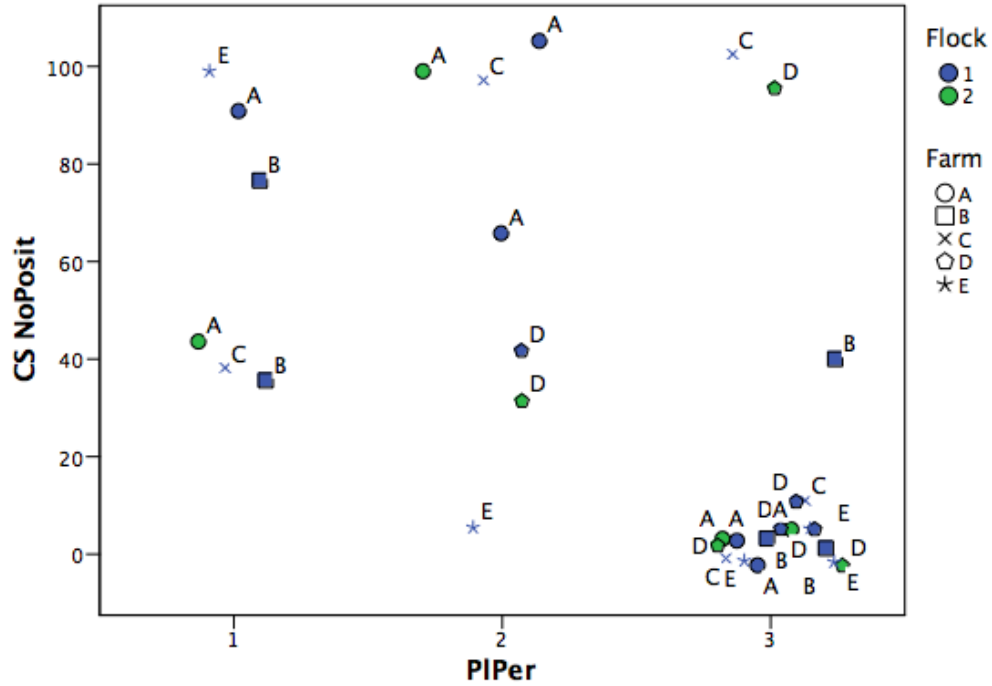

**Figure S5.** Relationship between the duration of interventions (1: "1 to 2 hours", 2: "1/2 day", 3: "1 day or several 1/2 days", 4: "More than one day") and Cq values of *C. psittaci* shedding (Spearman's rho = -0.498,  $p = 0.035$ ). The points indicate the percentage of positive birds in different places in which the duration of interventions varies. The scatterplot depicts the "duration-of-operations" variable (DPer) on the horizontal (X) axis, and the "mean-Cq-value" variable (CS Cq) on the vertical (Y) axis. The load of shedding was higher (low Cq values) when the intervention lasted for one or more than one day.

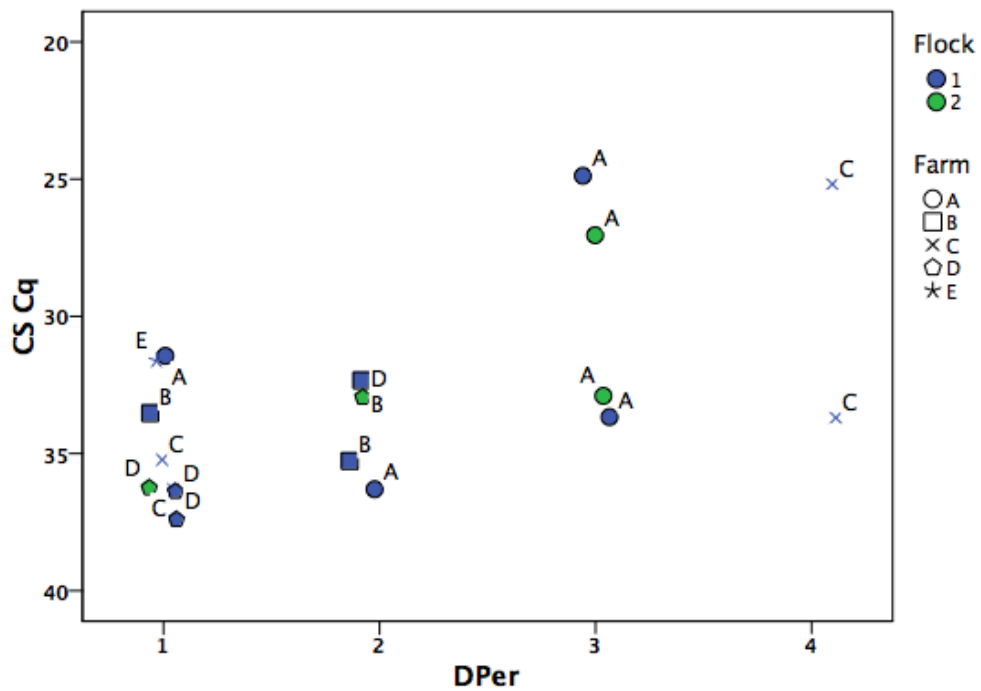

**Figure S6.** Prevalence and level of *C. psittaci* shedding variables, analyzed and evaluated by the Mann-Whitney test for all breeding spaces overall, showed significant difference between indoors and outdoors ( $p = 0.018$  for the prevalence and  $p < 0.001$  for the Cq values). The box-plots depict the “place-of-operation” variable (Place) on the horizontal (X) axis, and the “prevalence-of-shedders” variable (CS NoPosit) or the “mean-Cq-value” variable (CS Cq) on the vertical (Y) axis (A and B, respectively). Significant differences were also found between indoors, enclosures, and outdoor expansion areas concerning the level of *C. psittaci* shedding ( $p < 0.001$ ), with the highest levels (lower Cq values) corresponding to enclosures (C).

**A**

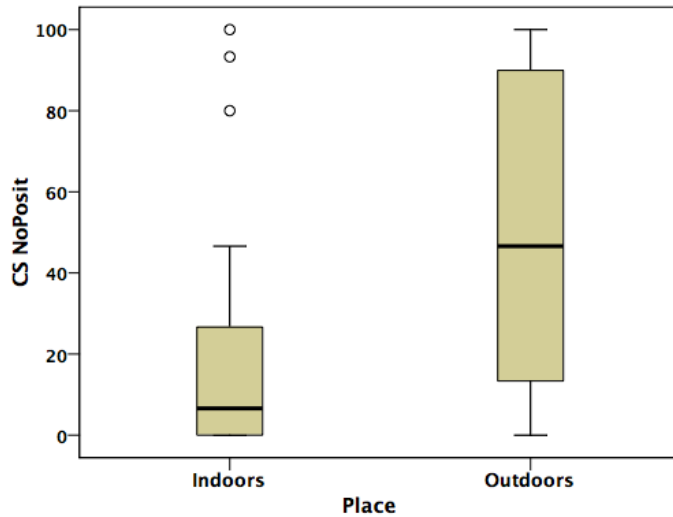

**B**

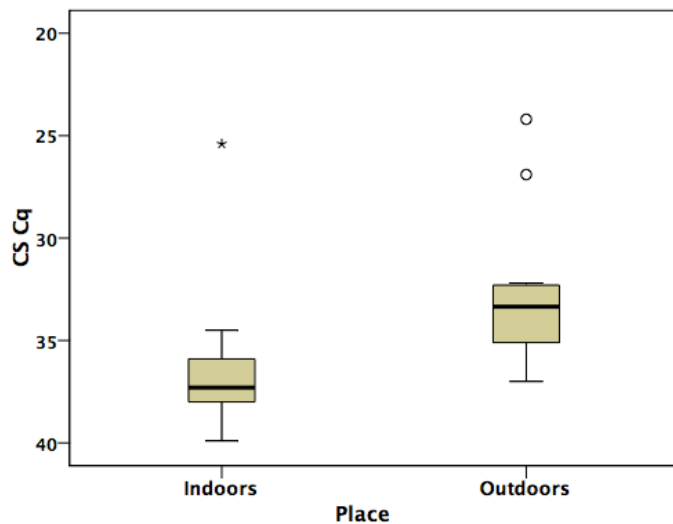

C

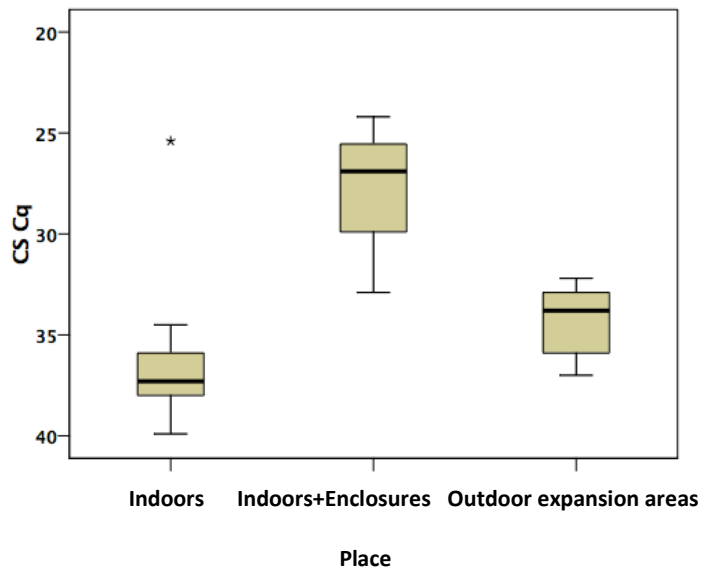

**Figure S7.** A significant effect of the intervention factor was found on prevalence ( $p = 0.008$ ) and level ( $p = 0.001$ ) of *C. psittaci* shedding. The box-plots depict the "Intervention" variable on the horizontal (X) axis, and the "prevalence-of-shedders" variable (CS NoPosit) or the mean-Cq-value variable (CS Cq) on the vertical (Y) axis.

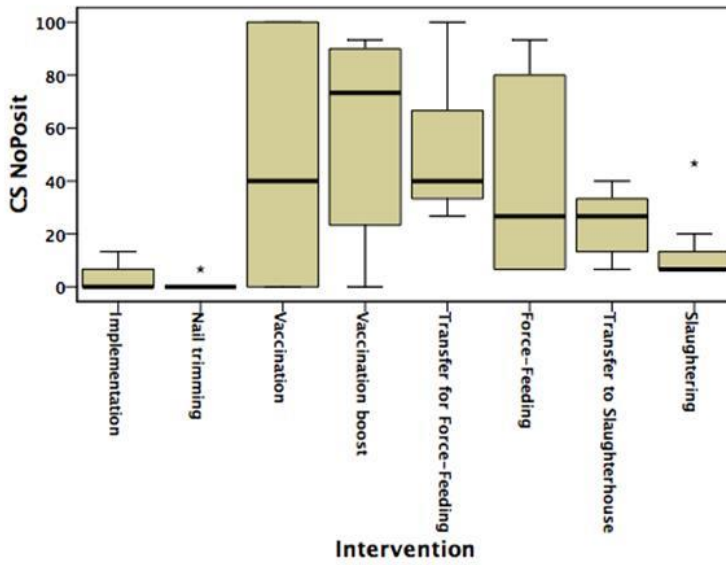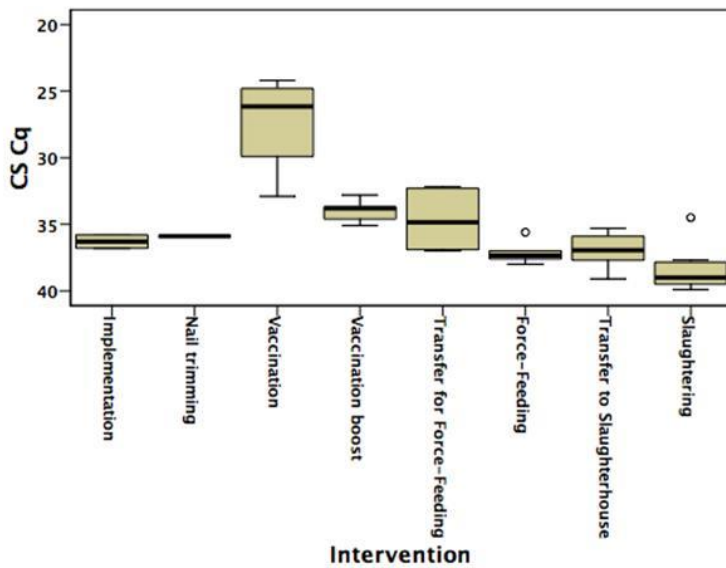

Supplement: AEM.03179-15_zam999116962so1.pdf [file AEM.03179-15_zam999116962so1.pdf]
